# Supplementary material
Source: PubMed Central journal article supplement (PMC3957656)
Supplement: AEM.04007-13_zam999105209so1.pdf [file AEM.04007-13_zam999105209so1.pdf]

Supplementary TABLE 1: Primer sequences used in this study.

Restriction sites incorporated in the primers are underlined.

| No. | Primer name | Sequence (5' → 3') <sup>a</sup>                         | Target DNA region |
|-----|-------------|---------------------------------------------------------|-------------------|
| 1   | BG2405      | GCGCG <u>TCatg</u> <u>aaagc</u> attaa caaaaacaaa tccag  | <i>CBEI_0223</i>  |
| 2   | BG2524      | GCGCG <u>CTCGA</u> <u>Gagat</u> cttat tactactttt aattc  | <i>CBEI_0223</i>  |
| 3   | BG2413      | GCGCG <u>TCatg</u> <u>aaaac</u> aaaag tattgttaat taaagc | <i>CBEI_0685</i>  |
| 4   | BG2527      | GCGCG <u>CTCGA</u> <u>Gatt</u> attaaat atctttaaga cttac | <i>CBEI_0685</i>  |
| 5   | BG2203      | GCGCG <u>TCatg</u> <u>aaagc</u> agcat tatggtatgc        | <i>CBEI_1464</i>  |
| 6   | BG2204      | GCGCG <u>CTCGA</u> <u>Gagatt</u> taga tacaagttct ttg    | <i>CBEI_1464</i>  |
| 7   | BG2411      | GCGCG <u>CATat</u> <u>gatt</u> acaaca attcaaaatg agaaag | <i>CBEI_2243</i>  |
| 8   | BG2528      | GCGCG <u>CTCGA</u> <u>Gcaca</u> actgt aagcacg           | <i>CBEI_2243</i>  |
| 9   | BG2415      | GCGCG <u>ATTAa</u> <u>tgga</u> tgtgttt tttatgaaac taatg | <i>CBEI_3864</i>  |
| 10  | BG2529      | GCGCG <u>CTCGA</u> <u>Gttc</u> catagt taaaacagct c      | <i>CBEI_3864</i>  |
| 11  | BG2407      | GCGCG <u>ATTAa</u> <u>tgcg</u> tgcttt aaaatataat ggg    | <i>CBEI_3890</i>  |
| 12  | BG2408      | GCGCG <u>CTCGA</u> <u>Gttata</u> acttttgcattcttttc      | <i>CBEI_3890</i>  |

Supplementary TABLE 2: Bacterial strains and plasmids used in this study

|                                              | <b>Relevant genotype</b>                                                                                               | <b>Remarks</b>                                                                           | <b>Source</b>                          |
|----------------------------------------------|------------------------------------------------------------------------------------------------------------------------|------------------------------------------------------------------------------------------|----------------------------------------|
| <b><u>Bacterial strains</u></b>              |                                                                                                                        |                                                                                          |                                        |
| <i>E. coli</i> NEB 5-alpha F' I <sup>q</sup> | proA <sup>+</sup> B <sup>+</sup> lacI <sup>q</sup><br>Δ(lacZ)M15 recA1                                                 | Cloning strain                                                                           | Invitrogen /<br>New England<br>Biolabs |
| <i>E. coli</i> BL21 (λDE3)                   | F <sup>-</sup> ompT gal dcm lon<br>hsdS <sub>B</sub> (r <sub>B</sub> <sup>-</sup> m <sub>B</sub> <sup>-</sup> ) λ(DE3) | Expression strain                                                                        | Merck Millipore                        |
| <b><u>Plasmids</u></b>                       |                                                                                                                        |                                                                                          |                                        |
| pWUR463                                      | pET24d;<br>P <sub>T7</sub> -CBEI_0223                                                                                  | Expression plasmid of<br><i>CBEI_0223</i> with His-tag under<br>control of a T7 promoter | This study                             |
| pWUR461                                      | pET24d;<br>P <sub>T7</sub> -CBEI_0685                                                                                  | Idem for <i>CBEI_0685</i>                                                                | This study                             |
| pWUR450                                      | pET24d;<br>P <sub>T7</sub> -CBEI_1464                                                                                  | Idem for <i>CBEI_1464</i> ( <i>Cb-acr</i> )                                              | This study                             |
| pWUR464                                      | pET26b;<br>P <sub>T7</sub> -CBEI_2243                                                                                  | Idem for <i>CBEI_2243</i>                                                                | This study                             |
| pWUR462                                      | pET26b;<br>P <sub>T7</sub> -CBEI_3864                                                                                  | Idem for <i>CBEI_3864</i>                                                                | This study                             |
| pWUR452                                      | pET26b;<br>P <sub>T7</sub> -CBEI_3890                                                                                  | Idem for <i>CBEI_3890</i> , without<br>His-tag                                           | This study                             |
